# Supplementary material
Source: PubMed Central journal article supplement (PMC4458158)
Supplement: NIHMS682035-supplement.pdf [file NIHMS682035-supplement.pdf]

| Cancer Type                                       | Males    |          | Females  |          | Overall |              |
|---------------------------------------------------|----------|----------|----------|----------|---------|--------------|
|                                                   | Observed | Expected | Observed | Expected | SIR     | 95% CI       |
| <b>GASTROINTESTINAL and HEPATOBILIARY CANCERS</b> |          |          |          |          |         |              |
| Colorectal cancer                                 | 2.00     | 2.39     | 1.00     | 2.69     | 0.59    | 0.12 – 1.72  |
| Small intestinal cancer                           | 0.00     | 0.11     | 2.00     | 0.10     | 9.42    | 1.14 – 33.90 |
| Biliary tract cancer                              | 3.00     | 0.07     | 0.00     | 0.07     | 21.18   | 4.38 - 61.79 |
| Hepatocellular cancer                             | 0.00     | 0.24     | 1.00     | 0.13     | 2.73    | 0.07 – 15.15 |
| Gallbladder cancer                                | 0.00     | 0.03     | 0.00     | 0.08     | 0.00    | 0.00 – 35.06 |
| Pancreatic cancer                                 | 1.00     | 0.50     | 1.00     | 0.54     | 1.91    | 0.23 – 6.88  |
| Gastric cancer                                    | 0.00     | 0.30     | 0.00     | 0.18     | 0.00    | 0.00 - 7.65  |
| Esophageal cancer                                 | 0.00     | 0.39     | 0.00     | 0.10     | 0.00    | 0.00 – 7.51  |
| Anal cancer                                       | 0.00     | 0.04     | 0.00     | 0.11     | 0.00    | 0.00 – 24.91 |
| <b>TOBACCO-RELATED CANCER</b>                     |          |          |          |          |         |              |
| Lung cancer                                       | 3.00     | 3.30     | 2.00     | 3.01     | 0.79    | 0.26 – 1.85  |
| Oral cancer                                       | 0.00     | 0.21     | 0.00     | 0.06     | 0.00    | 0.00 – 13.60 |
| Head and neck cancer                              | 0.00     | 0.46     | 2.00     | 0.24     | 2.85    | 0.35 – 10.27 |
| Bladder cancer                                    | 3.00     | 1.43     | 0.00     | 0.52     | 1.54    | 0.32 – 4.50  |
| Kidney cancer                                     | 1.00     | 0.89     | 1.00     | 0.63     | 1.32    | 0.16 – 4.76  |
| <b>MALE REPRODUCTIVE ORGAN CANCERS</b>            |          |          |          |          |         |              |
| Testicular Cancer                                 | 0.00     | 0.30     | -        | -        | 0.00    | 0.00-12.28   |
| Prostate cancer                                   | 7.00     | 5.62     | -        | -        | 1.25    | 0.50 – 2.56  |
| <b>FEMALE REPRODUCTIVE ORGAN CANCER</b>           |          |          |          |          |         |              |
| Ovarian cancer                                    | -        | -        | 1.00     | 0.78     | 1.28    | 0.03 – 7.10  |
| Cervical cancer                                   | -        | -        | 0.00     | 0.41     | 0.00    | 0.00 – 8.93  |
| Breast cancer                                     | -        | -        | 7.00     | 7.05     | 0.99    | 0.40 – 2.04  |
| Uterine cancer                                    | -        | -        | 4.00     | 1.67     | 2.40    | 0.65 – 6.15  |
| <b>MISCELLANEOUS EXTRA-INTESTINAL CANCER</b>      |          |          |          |          |         |              |
| Brain cancer                                      | 2.00     | 0.32     | 1.00     | 0.29     | 4.93    | 1.02 – 14.38 |
| Spinal cord cancer                                | 0.00     | 0.34     | 0.00     | 0.31     | 0.00    | 0.00 – 5.70  |
| Thyroid cancer                                    | 0.00     | 0.26     | 2.00     | 0.87     | 1.77    | 0.21 – 6.39  |
| <b>HEMATOLOGICAL CANCER</b>                       |          |          |          |          |         |              |
| Hodgkin's lymphoma                                | 2.00     | 0.13     | 1.00     | 0.13     | 11.34   | 2.34 – 33.07 |
| Non-Hodgkin's lymphoma                            | 1.00     | 0.97     | 1.00     | 1.00     | 1.02    | 0.12 – 3.66  |
| Acute and chronic leukemia                        | 0.00     | 0.69     | 0.60     | 1.66     | 0.78    | 0.02 – 4.30  |
| <b>MELANOMA</b>                                   | 4.00     | 0.88     | 1.00     | 0.95     | 2.72    | 0.88-6.33    |

SIR, standardized incidence ratio; 95% CI, 95% confidence interval.

**Supplementary Table 1.** Standardized incidence ratios of site-specific cancers in 377 patients with CD, compared with age- and sex-matched general population, in Olmsted County, Minnesota, 1940-2011.

| Cancer Type                                       | Males    |          | Females  |          | Overall |              |
|---------------------------------------------------|----------|----------|----------|----------|---------|--------------|
|                                                   | Observed | Expected | Observed | Expected | SIR     | 95% CI       |
| <b>GASTROINTESTINAL and HEPATOBILIARY CANCERS</b> |          |          |          |          |         |              |
| Colorectal cancer                                 | 3.00     | 5.40     | 3.00     | 3.73     | 0.66    | 0.24 – 1.43  |
| Small intestinal cancer                           | 0.00     | 0.24     | 1.00     | 0.13     | 2.66    | 0.07 – 14.78 |
| Biliary tract cancer                              | 2.00     | 0.16     | 1.00     | 0.11     | 11.37   | 2.35 – 33.16 |
| Hepatocellular cancer                             | 0.00     | 0.52     | 0.00     | 0.17     | 0.00    | 0.00 – 5.35  |
| Gallbladder cancer                                | 0.00     | 0.06     | 0.00     | 0.11     | 0.00    | 0.00 – 21.33 |
| Pancreatic cancer                                 | 0.00     | 1.13     | 1.00     | 0.76     | 0.53    | 0.01 – 2.93  |
| Gastric cancer                                    | 0.00     | 0.68     | 0.00     | 0.24     | 0.00    | 0.00 – 4.00  |
| Esophageal cancer                                 | 1.00     | 0.85     | 0.00     | 0.14     | 1.01    | 0.03 – 5.60  |
| Anal cancer                                       | 0.00     | 0.08     | 1.00     | 0.13     | 4.61    | 0.12 – 25.57 |
| <b>TOBACCO RELATED CANCER</b>                     |          |          |          |          |         |              |
| Lung cancer                                       | 3.00     | 7.60     | 1.00     | 4.08     | 0.34    | 0.09 – 0.88  |
| Oral cancer                                       | 1.00     | 0.42     | 0.00     | 0.07     | 2.03    | 0.05 – 11.29 |
| Head and neck cancer                              | 0.00     | 0.96     | 0.00     | 0.32     | 0.00    | 0.00 – 2.88  |
| Bladder cancer                                    | 5.00     | 3.38     | 2.00     | 0.71     | 1.71    | 0.69 – 3.52  |
| Kidney cancer                                     | 3.00     | 1.86     | 0.00     | 0.83     | 1.11    | 0.23 – 3.25  |
| <b>MALE REPRODUCTIVE ORGAN CANCER</b>             |          |          |          |          |         |              |
| Testicular cancer                                 | 0.00     | 0.41     | -        | -        | 0.00    | 0.00-8.94    |
| Prostate cancer                                   | 14       | 12.56    | -        | -        | 1.11    | 0.61 – 1.87  |
| <b>FEMALE REPRODUCTIVE ORGAN CANCER</b>           |          |          |          |          |         |              |
| Ovarian cancer                                    | -        | -        | 2.00     | 0.99     | 2.01    | 0.24 – 7.24  |
| Cervical cancer                                   | -        | -        | 0.00     | 0.46     | 0.00    | 0.00 – 8.09  |
| Breast cancer                                     | -        | -        | 12       | 8.85     | 1.36    | 0.70 – 2.37  |
| Uterine cancer                                    | -        | -        | 1.00     | 2.15     | 0.46    | 0.01 – 2.58  |
| <b>MISCELLANEOUS EXTRA-INTESTINAL CANCER</b>      |          |          |          |          |         |              |
| Brain cancer                                      | 0.00     | 0.63     | 1.00     | 0.36     | 1.02    | 0.03 – 5.65  |
| Spinal cord cancer                                | 1.00     | 0.65     | 0.00     | 0.38     | 0.97    | 0.02 – 5.37  |
| Thyroid cancer                                    | 1.00     | 0.47     | 2.00     | 0.94     | 2.13    | 0.44 – 6.20  |
| <b>HEMATOLOGICAL CANCER</b>                       |          |          |          |          |         |              |
| Hodgkin's lymphoma                                | 0.00     | 0.22     | 0.00     | 0.13     | 0.00    | 0.00 – 10.47 |
| Non-Hodgkin's lymphoma                            | 2.00     | 2.07     | 1.00     | 1.33     | 0.88    | 0.18 – 2.57  |
| Acute and chronic leukemia                        | 3.00     | 1.52     | 2.00     | 0.80     | 2.16    | 0.70 – 5.02  |
| <b>MELANOMA</b>                                   | 4.00     | 1.82     | 2.00     | 1.10     | 2.05    | 0.75-4.46    |

SIR, standardized incidence ratio; 95% CI, 95% confidence interval.

**Supplementary Table 2.** Standardized incidence ratios of site-specific cancers in 462 patients with UC, compared with age- and sex-matched general population, in Olmsted County, Minnesota, 1940-2011.

|                                              | Cancer category                                    | Observed | Expected   | SIR          | 95% CI            |
|----------------------------------------------|----------------------------------------------------|----------|------------|--------------|-------------------|
| 5-ASA-treated v. general population          | Intestinal cancers                                 | 5        | 3.8        | 1.32         | 0.43-3.07         |
|                                              | Tobacco-related cancers                            | 5        | 4.7        | 1.06         | 0.34-2.48         |
|                                              | Male reproductive organ cancers                    | 2        | 2.7        | 0.74         | 0.09-2.68         |
|                                              | Female reproductive organ cancers                  | 4        | 3.8        | 1.05         | 0.29-2.70         |
|                                              | Miscellaneous extra-intestinal solid organ cancers | 1        | 1.3        | 0.77         | 0.02-4.28         |
|                                              | Hematological cancers                              | 1        | 1.6        | 0.62         | 0.02-3.48         |
| Corticosteroid-treated v. general population | Intestinal cancers                                 | 1        | 0.7        | 1.43         | 0.04-7.96         |
|                                              | Tobacco-related cancers                            | 2        | 0.9        | 2.22         | 0.27-8.03         |
|                                              | Male reproductive organ cancers                    | 0        | 0.6        | 0.00         | 0.0-6.15          |
|                                              | Female reproductive organ cancers                  | 0        | 0.7        | 0.00         | 0.0-5.27          |
|                                              | Miscellaneous extra-intestinal solid organ cancers | 2        | 0.4        | 5.00         | 0.60-18.06        |
|                                              | Hematological cancers                              | 2        | 0.3        | 6.67         | 0.81-24.08        |
| IMM-treated v. general population            | Intestinal cancers                                 | 0        | 0.5        | 0.00         | 0.0-7.38          |
|                                              | Tobacco-related cancers                            | 1        | 0.7        | 1.43         | 0.04-7.96         |
|                                              | Male reproductive organ cancers                    | 1        | 0.5        | 2.00         | 0.05-11.14        |
|                                              | Female reproductive organ cancers                  | 1        | 0.6        | 1.67         | 0.04-9.29         |
|                                              | Miscellaneous extra-intestinal solid organ cancers | 2        | 0.3        | 6.67         | 0.81- 24.08       |
|                                              | <b>Hematological cancers</b>                       | <b>2</b> | <b>0.2</b> | <b>10.00</b> | <b>1.21-36.12</b> |
| Anti-TNF-treated v. general population       | Intestinal cancers                                 | 0        | 0.1        | 0.00         | 0.0-36.12         |
|                                              | Tobacco-related cancers                            | 0        | 0.2        | 0.00         | 0.0-18.44         |
|                                              | Male reproductive organ cancers                    | 0        | 0.1        | 0.00         | 0.0-36.89         |
|                                              | Female reproductive organ cancers                  | 0        | 0.3        | 0.00         | 0.0-12.30         |
|                                              | Miscellaneous extra-intestinal solid organ cancers | 0        | 0.1        | 0.00         | 0.0-36.89         |
|                                              | Hematological cancers                              | 1        | 0.1        | 10.00        | 0.25-55.72        |

SIR, standardized incidence ratio; 5-ASA, 5-aminosalicylate; IMM, immunomodulator; anti-TNF, anti-tumor necrosis factor.

**Supplementary Table 3.** Standardized incidence ratio of category-specific cancer in 5-ASA, corticosteroid, immunomodulator and anti-TNF treated patients with IBD, compared with age- and sex-matched general population. Text in bold represents statistically significant results.
